# Supplementary material for: PET imaging of mitochondrial function in acute doxorubicin-induced cardiotoxicity: a proof-of-principle study
Source: PubMed Central journal article supplement (PMC9005533; doi:10.1038/s41598-022-10004-6), 2022-04-12
Supplement: 41598_2022_10004_MOESM1_ESM.pdf [file 41598_2022_10004_MOESM1_ESM.pdf]

**PET imaging of mitochondrial function in acute doxorubicin-induced cardiotoxicity: a proof-of-principle study - *Supplementary Data***

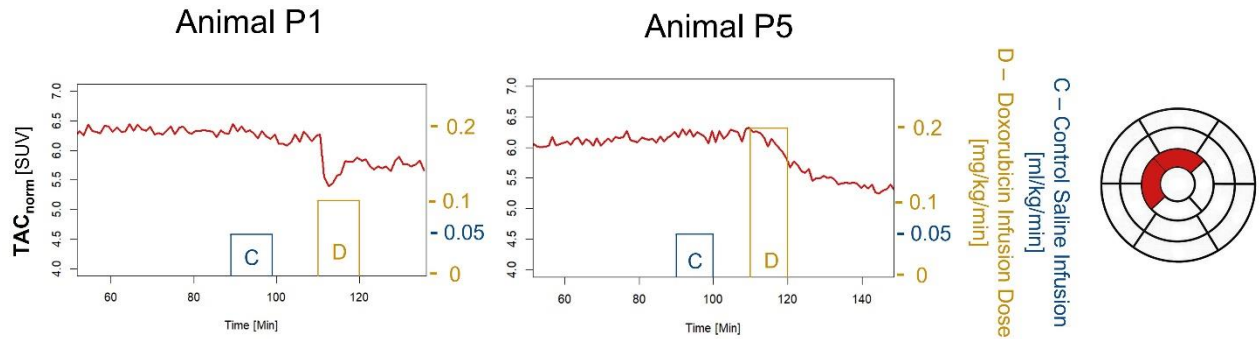

**Figure S1**

Normalized TACs averaged for two segments of the LAD for one example animal of group A (1 mg/kg DOX dose, left) and one example animal of group B (2 mg/kg DOX dose right). The golden line shows the rate of the DOX (D) infusion over time, the blue line indicates the volume rate of the control saline infusion (C). After the DOX infusion, the tissue tracer concentration recovered to a value close to its baseline value for the animal of group A, whereas no recovery was observed for animal B. The standard 17 segment polar map of the myocardium (right) is visualizing the location of the two segments.

Animal P1 (Group A)

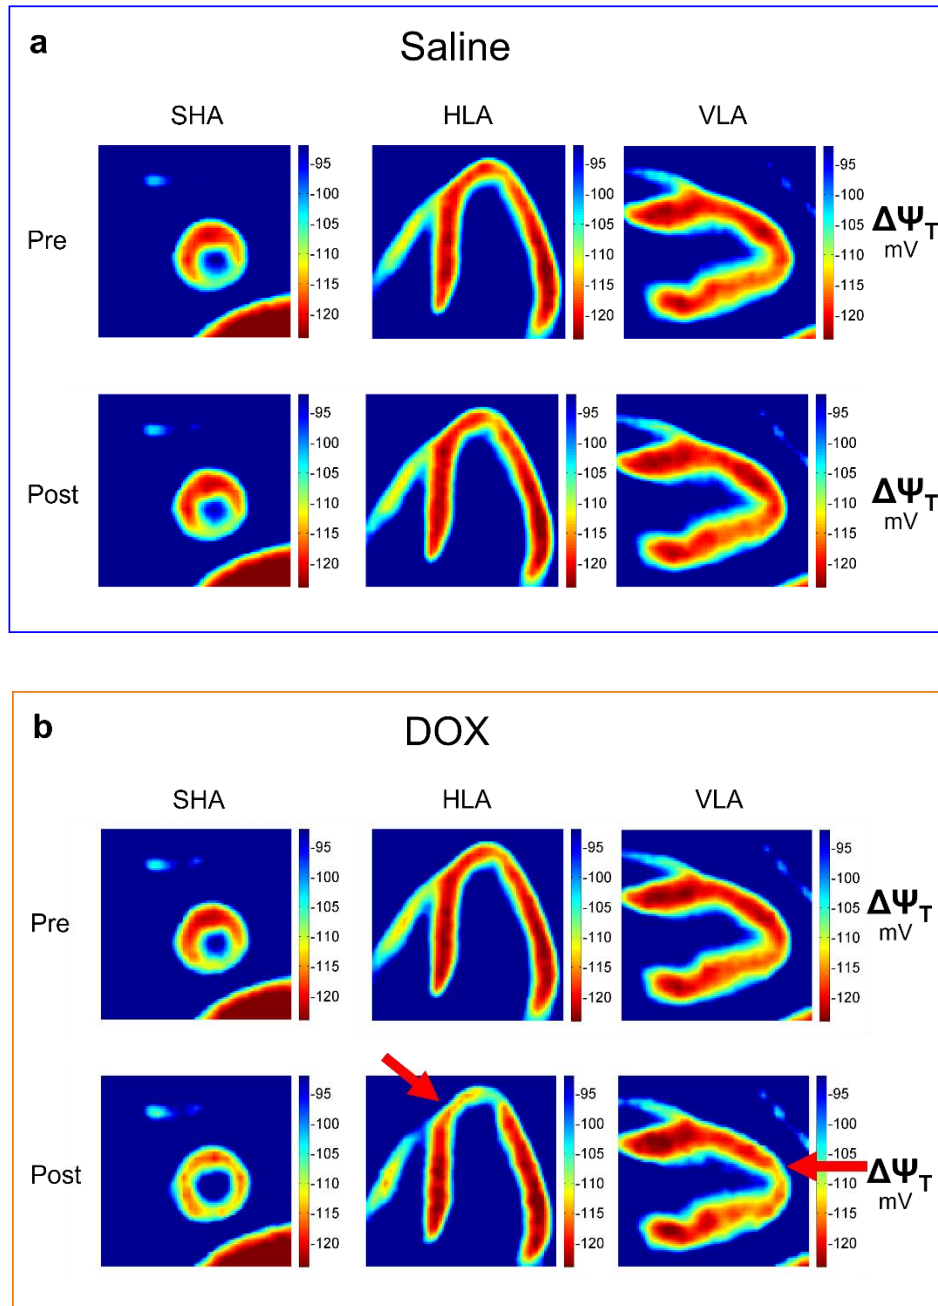

**Figure S2**

Parametric images of  $\Delta\Psi_T$  before and after the saline (a) as well as the DOX infusion (b) for one animal of group A shown in three standard views.

Animal P7 (Group B)

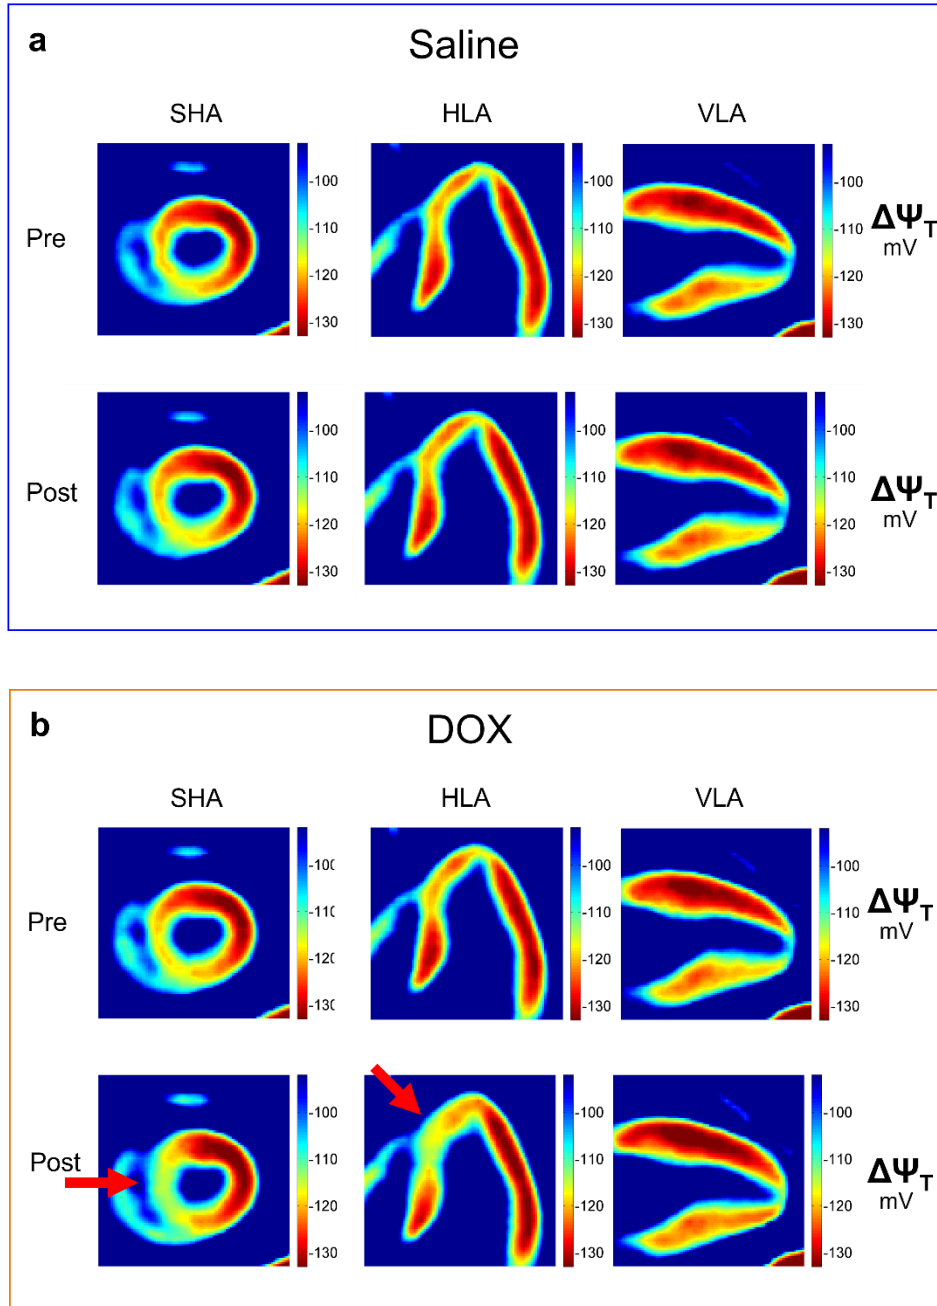

**Figure S3**

Parametric images of  $\Delta\Psi_T$  before and after the saline (a) as well as the DOX infusion (b) for one animal of group B shown in three standard views.

**Table S1** Imaging parameters and calculated  $f_{ECV}$  values for the 8 animals. For animals P3 – P8, two CT volumes were acquired before and after iodine contrast injection and used to calculate the average  $f_{ECV}$ .

PRE=pre-contrast; POST=post-contrast; Delay=time between contrast administration and post-contrast image acquisition

| Animal | $f_{ECV}$ Test | $f_{ECV}$ | Average   | Delay  | kVp       | kVp       | kVp (mA)  | kVp (mA)  |
|--------|----------------|-----------|-----------|--------|-----------|-----------|-----------|-----------|
|        |                | Retest    | $f_{ECV}$ |        | (mA)      | (mA)      |           |           |
|        |                |           |           |        | test      | retest    |           |           |
| P1     | 0.34581        | -         | 0.34581   | 15 min | 100 (200) | -         | 100 (200) | -         |
| P2     | 0.3319         | -         | 0.3319    | 15 min | 100 (200) | -         | 100 (200) | -         |
| P3     | 0.24414        | 0.29767   | 0.270905  | 10 min | 120 (345) | 120 (345) | 120 (345) | 120 (345) |
| P4     | 0.31991        | 0.28223   | 0.30107   | 10 min | 120 (345) | 120 (345) | 120 (345) | 120 (345) |
| P5     | 0.2805         | 0.30362   | 0.29206   | 10 min | 100 (345) | 100 (345) | 100 (345) | 100 (345) |
| P6     | 0.2914         | 0.28991   | 0.290655  | 10 min | 100 (345) | 100 (345) | 100 (345) | 100 (345) |

|    |        |        |         |           |              |              |           |           |
|----|--------|--------|---------|-----------|--------------|--------------|-----------|-----------|
| P7 | 0.3051 | 0.2932 | 0.29915 | 10<br>min | 100<br>(345) | 100<br>(345) | 100 (300) | 100 (175) |
| P8 | 0.3221 | 0.334  | 0.32805 | 10<br>min | 100<br>(345) | 100<br>(345) | 100 (345) | 100 (345) |

**Table S2** For each animal, the average [ $^{18}\text{F}$ ]TPP<sup>+</sup> concentration in myocardium was calculated before and after the saline as well as DOX infusions by averaging the concentration starting x=0-20 minutes after the beginning of the infusion over y=5-15 minutes, indicated in the table as (x) y minutes. E.g., for animals receiving 1 mg/kg of DOX, the average [ $^{18}\text{F}$ ]TPP<sup>+</sup> concentration in the myocardium before the DOX infusion was determined over 10 minutes before the start of the DOX infusion, the average concentration after the DOX infusion was calculated as the mean over 5 minutes starting 5 minutes after the beginning of the DOX infusion.

|        | Saline Infusion | DOX Infusion   |                 |
|--------|-----------------|----------------|-----------------|
|        |                 | (1 mg/kg)      | (2 mg/kg)       |
| Before | (0) 10 minutes  | (0) 10 minutes | (0) 10 minutes  |
| After  | (0) 10 minutes  | (5) 5 minutes  | (20) 15 minutes |

**Table S3** Results of the fitted linear mixed effects model. *ContrSegm* refers to the contrasts for testing hypothesis 1), *ContrDSal* for testing hypothesis 2), and *ContrD1D2* for hypothesis 3). The last two rows show the obtained values for the two tested interaction terms, assessing whether  $\delta\Delta\Psi_T$  was significantly different for the saline vs. DOX infusion and DOX infusion of 1 mg/kg vs. 2 mg/kg when taking a different effect depending on the segments into account. Df=approximated degrees of freedom

|                            | Estimate | Std. Error | Df       | t-value | p-value |
|----------------------------|----------|------------|----------|---------|---------|
| <b>(Intercept)</b>         | -0.29419 | 0.1292     | 7.28339  | -2.2775 | 0.0554  |
| <b>ContrSegm</b>           | 4.347541 | 0.4169     | 243.3012 | 10.4284 | <0.0001 |
| <b>ContrDSal</b>           | 0.10653  | 0.1522     | 243.3012 | 0.6998  | 0.4847  |
| <b>ContrD1D2</b>           | -0.57783 | 0.2085     | 145.9596 | -2.7717 | 0.0063  |
| <b>ContrSegm:ContrDSal</b> | 8.979525 | 1.0547     | 243.3012 | 8.5141  | <0.0001 |
| <b>ContrSegm:ContrD1D2</b> | 3.649884 | 1.1186     | 243.3012 | 3.2628  | 0.0013  |
